## Lipopolysaccharide induces acute bursal atrophy in broiler chicks by activating TLR4-MAPK-NF- $\kappa$ B/AP-1 signaling

Abdur Rahman Ansari<sup>1,2</sup>, Ning-Ya Li<sup>1</sup>, Zhi-Jian Sun<sup>1</sup>, Hai-Bo Huang<sup>1</sup>, Xing Zhao<sup>1</sup>, Lei Cui<sup>1</sup>, Ya-Fang Hu<sup>1</sup>, Ju-Ming Zhong<sup>1,3</sup>, Niel A. Karrow<sup>4</sup> and Hua-Zhen Liu<sup>1</sup>

<sup>1</sup> Department of Basic Veterinary Medicine, College of Animal Science and Veterinary Medicine, Huazhong Agricultural University, Wuhan, Hubei, China

<sup>2</sup> Department of Basic Sciences, Section of Anatomy and Histology, College of Veterinary and Animal Sciences (CVAS) Jhang, University of Veterinary and Animal Sciences (UVAS), Lahore, Pakistan

<sup>3</sup> Department of Anatomy, Physiology and Pharmacology, College of Veterinary Medicine, Auburn University, Auburn, USA

<sup>4</sup> Department of Animal Biosciences, University of Guelph, Guelph, Ontario, Canada

**Correspondence to:** Hua-Zhen Liu, **email:** lhz219@mail.hzau.edu.cn

**Keywords:** lipopolysaccharide, chicken, bursa of Fabricius, acute atrophy, transcriptional analysis, Immunology

**Received:** November 21, 2016

**Accepted:** July 23, 2017

**Published:** August 05, 2017

**Copyright:** Ansari et al. This is an open-access article distributed under the terms of the Creative Commons Attribution License 3.0 (CC BY 3.0), which permits unrestricted use, distribution, and reproduction in any medium, provided the original author and source are credited.

### ABSTRACT

**We investigated the mechanisms that induce atrophy of the chicken bursa of Fabricius (BF) upon lipopolysaccharide (LPS) treatment in young chicks. LPS treatment resulted in ~36% decrease in bursal weight within 36 h ( $P < 0.01$ ). Histological analysis showed infiltration of eosinophilic heterophils and nucleated oval shaped RBCs in or near blood vessels of the BF from LPS-treated chicks. Scanning electron micrographs showed severe erosion and breaks in the mucosal membrane at 12 h and complete exuviation of bursal mucosal epithelial cells at 36 h. We observed decreased cell proliferation (low PCNA positivity) and increased apoptosis (high TUNEL and ssDNA positivity) in the BF 12-72 h after LPS treatment. RNA-seq analysis of the BF transcriptome showed 736 differentially expressed genes with most expression changes (637/736) 12 h after LPS treatment. KEGG pathway analysis identified TLR4-MAPK-NF- $\kappa$ B/AP-1 as the key signaling pathway affected in response to LPS stimulation. These findings indicate LPS activates the TLR4-MAPK-NF- $\kappa$ B/AP-1 signaling pathway that mediates acute atrophy of the chicken bursa of Fabricius by inducing inflammation and apoptosis.**

### INTRODUCTION

The bursa of Fabricius (BF) is an avian specific immune organ. It has a specialized microenvironment that supports the differentiation of B cells and production of antibodies [1, 2]. Acute atrophy of BF is observed during various infectious diseases including bursal disease virus [3, 4], Marek's disease virus [5, 6], Fowl adenoviruses [7], *Escherichia coli*, fowl typhoid and *Salmonella* [8-10]. *Salmonella enterica* serovar Typhimurium (STm) is a gram-negative facultative anaerobic bacterium that causes serious clinical disease in newly hatched chicks [11], which is characterized by severe diarrhea, dehydration, and increased mortality [12]. STm infection results in immune suppression, cytokine imbalance and disruption

of lymphoid tissue architecture [13]. The JNK signaling pathway plays a critical role during STm-induced thymic injury in mice [14, 15]. Although BF plays a significant role in STm infection in poultry [16], only few scientific reports have described the transcriptional changes in BF following STm infection in avian species.

Since the acquired immune system in the neonatal chicken is not completely functional until the first week, the innate immune system plays defensive crucial role for the chicks [17]. Bursa is important in the innate immunity of neonatal chicken and < 0.1% BF to body weight indicates infection in broilers [18, 19]. TLRs are key mediators of innate immune responses to various infections [20]. For gram negative bacteria, the endotoxin LPS is recognized by TLR2 and TLR4 [21, 22]. LPS

stimulation disrupts the histo-morphological organization of different organs including BF of chicken [23, 24]. Reduced body and bursa weight are also characteristic of *salmonella* LPS stimulated chickens [25]. NF- $\kappa$ B and AP-1 are two key down-stream transcriptional factors of the TLR4 signaling pathways [26], which induce various inflammatory factors including TNF- $\alpha$ , IL-6, IL-8, IL-1b [26, 27]. Furthermore, chronic inflammation results in apoptosis of immune cells [28]. Inflammation in response to LPS results in induction of pro-apoptotic factors including nitric oxide, TNF- $\alpha$  and glucocorticoids [29, 30]. Although studies have described the immune response and atrophy of immune organs mediated by infectious diseases in model organisms like mice, rats as well as humans, the molecular mechanism of bursal atrophy is still largely unknown. Therefore, in the current study, we investigated the molecular mechanisms involved in acute bursal atrophy in young chickens induced by *Salmonella* LPS.

## RESULTS

### Bursal atrophy after LPS treatment

Bursal weight and bursal index were analyzed at 0, 2, 6, 12, 36, 72 and 120 h in chicks after intra-peritoneal injection of saline (control) or 50 mg/kg LPS (Figure 1). LPS treatment resulted in ~ 36% decrease in bursal weight ( $P < 0.01$ ,  $0.07 \pm 0.01$  vs.  $0.11 \pm 0.02$  g) and ~ 18% in bursal index ( $P < 0.05$ ,  $1.06 \pm 0.18$  vs.  $1.30 \pm 0.11$ ) at 36 h compared to control. At 72 h, LPS treatment resulted in ~ 13% decrease in bursal weight ( $P > 0.05$ ,  $0.13 \pm 0.03$  vs.  $0.15 \pm 0.05$  g) and ~ 10% reduction in bursal index ( $P > 0.05$ ,  $1.24 \pm 0.31$  vs.  $1.38 \pm 0.21$ ) compared to control. We also observed that the weight of bursa partially recovered to normal levels at 120 h post treatment (Figure 1A-1B). Furthermore, the decrease in bursal weight was associated with LPS dosage (Figure 1C-1D).

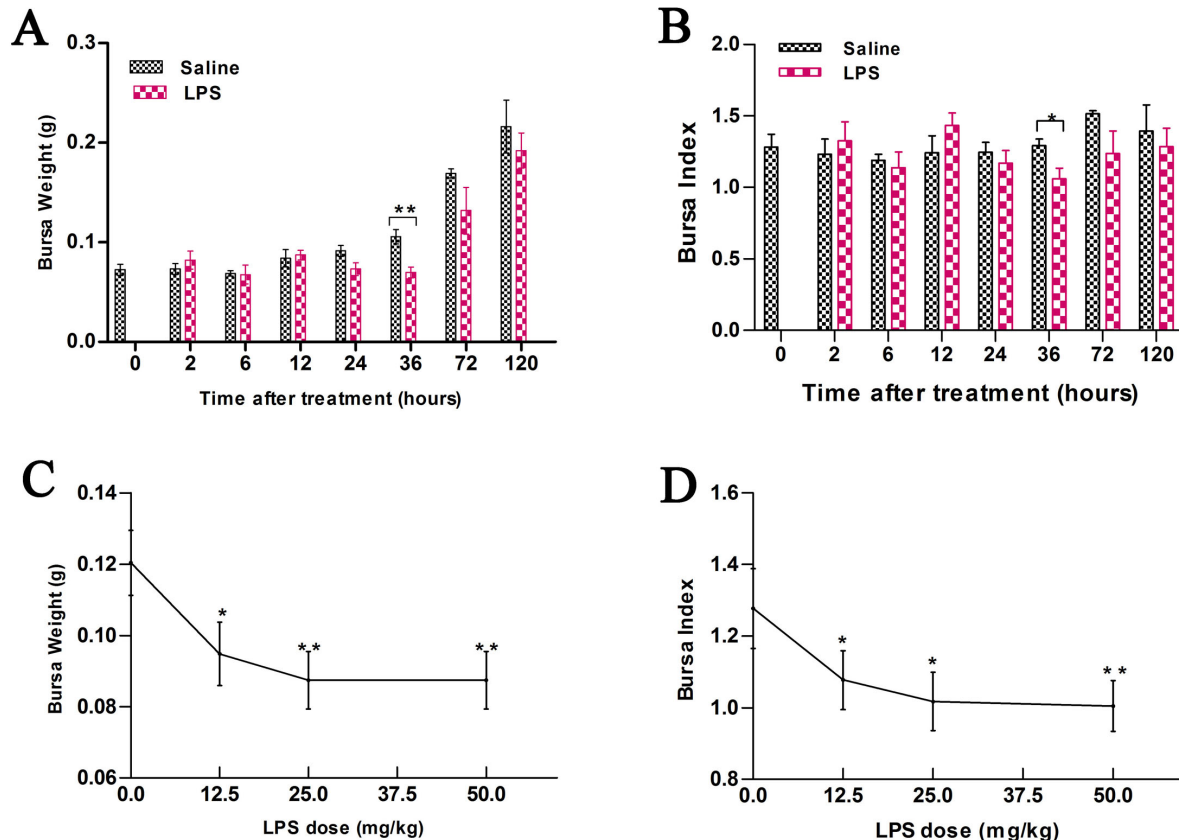

**Figure 1: Bursal weight and index in chicks treated with LPS.** A. Comparison of weights of bursa of Fabricius (BF) in chicks at different time points (0-120 h) after treatment with 50 mg/kg LPS or saline. B. Comparison of bursal index in chicks at different time points (0-120 h) after treatment with 50 mg/kg LPS or saline. C. Comparison of weights of bursa of Fabricius (BF) in chicks at 36 h after treatment with different doses of LPS or saline. D. Comparison of bursal index in chicks at 36 h after treatment with different doses of LPS or saline. As shown, LPS induces acute bursal atrophy in chicks. Note: \* denotes  $P < 0.05$ ; \*\* denotes  $P < 0.01$ .

**Table 1: Differentially expressed genes (DEGs) and related KEGG Pathways**

| DEGs associated with immunity and signal transduction pathways (at 12h post saline/LPS treatment) |                                                                                                                                                        |                                                                                                                                                    |                                                |             |
|---------------------------------------------------------------------------------------------------|--------------------------------------------------------------------------------------------------------------------------------------------------------|----------------------------------------------------------------------------------------------------------------------------------------------------|------------------------------------------------|-------------|
| No. DEGs                                                                                          | Upregulated genes                                                                                                                                      | Downregulated genes                                                                                                                                | Pathway                                        | P-value     |
| 10                                                                                                | PIK3CA, LOC107056430, LCP2, MAPK9, PIK3CG                                                                                                              | LOC107050724, LOC107056737, TAGLN, LOC107057160, LOC101750560                                                                                      | Fc epsilon RI signaling pathway (ko04664)      | 0.003053823 |
| 12                                                                                                | PIK3CA, IL15, CCL110, MAPK9, RPS6KA5, PIK3CG                                                                                                           | RLTPR, CNN1, LOC107057160, LOC101750560, LOC107050645, TAGLN,                                                                                      | TNF signaling pathway (ko04668)                | 0.00772329  |
| 15                                                                                                | PIK3CA, LOC107056430, CCL110, CCR2, DOCK10, DOCK2, PIK3CG, CXCL14, CXCL12                                                                              | LOC107050724, SASH3, PYGO2, LOC101750560, PDLIM7, TAGLN                                                                                            | Chemokine signaling pathway (ko04062)          | 0.008371477 |
| 24                                                                                                | NID1, F13A1, PIK3CA, MMP2, FGL1, CXCL12, LOC107056639, ITGAV, SPECC1L, CDH5, PIK3CG                                                                    | TESPA1, ACTN4, TAGLN, MYL9, PDLIM7, LOC107057430, LOC107050460, LOC107050724, LOC101750377, LOC101747592, LOC107056858, LOC107050373, LOC107051991 | Leukocyte transendothelial migration (ko04670) | 0.00961218  |
| 9                                                                                                 | PIK3CA, LOC107056430, PAK3, MAPK9, PIK3CG                                                                                                              | SASH3, PYGO2, LOC107057160, LOC101750560                                                                                                           | ErbB signaling pathway (ko04012)               | 0.02833687  |
| 10                                                                                                | PIK3CA, LOC107056737, DOCK10, PIK3CG                                                                                                                   | LOC107050724, SASH3, CFL2, LOC101750560, TAGLN, DOCK2                                                                                              | Fc gamma R-mediated phagocytosis (ko04666)     | 0.03687679  |
| 9                                                                                                 | BPI, TLR2A, PIK3CA, CD28, CCL110, MAPK9, PIK3CG, LOC107057160                                                                                          | LOC107057160, LOC101750560                                                                                                                         | Toll-like receptor signaling pathway (ko04620) | 0.05084102  |
| 18                                                                                                | IL1R2, LOC107056430, PDGFRA, FGF7, MAPK9, TGFBR1, RPS6KA5                                                                                              | HSPB1, SASH3, CNN1, JUN-D, LOC107057160, LOC101750560, RPS6KA3, CDC25B, LOC107051014, TAGLN, FLNA                                                  | MAPK signaling pathway (ko04010)               | 0.06491393  |
| DEGs associated with cancer pathways (at 12h post saline/LPS treatment)                           |                                                                                                                                                        |                                                                                                                                                    |                                                |             |
| 26                                                                                                | PIK3CA, DICER1, MMP2, FGL1, FGF7, GOLIM4, LOC107056430, PDGFRA, ZEB2, HNRPK, RPS6KA5, PIK3CG, LOC107056494                                             | LOC107057430, LOC107050460, LOC101750377, SASH3, E2F1, LOC107056068, PYGO2, TPM1, LOC101747592, LOC107050373, TESPA1, RASSF1, CDC25B               | MicroRNAs in cancer (ko05206)                  | 0.00172622  |
| 8                                                                                                 | LOC107056430, FGF7, RPS6KA5, LOC107055989, MMP2, LOC107056858                                                                                          | E2F1, RASSF1                                                                                                                                       | Bladder cancer (ko05219)                       | 0.008974338 |
| 30                                                                                                | PIK3CA, MMP2, FGL1, LOC107056430, FGF7, LOC107055989, FAM46C, LOC107056858, NID1, TLR2A, F13A1, PIK3CG, NUDT16L1, DCN, ITPR2, LUM, LOC107056639, ITGAV | TESPA1, PDLIM7, FLNA, TAGLN, LOC107056482, LOC107057430, LOC107050460, LOC101750377, LOC101747592, LOC107050373, LOC101750560, LOC107050724        | Proteoglycans in cancer (ko05205)              | 0.01710184  |
| 11                                                                                                | PIK3CA, LOC107056430, FGF7, PIK3CG, PDGFRA, GSTA3                                                                                                      | E2F1, LOC101750560, CDK2, LOC107050491, LOC107056196                                                                                               | Prostate cancer (ko05215)                      | 0.02190454  |
| 7                                                                                                 | PIK3CA, PIK3CG, TGFBR1, MAPK9, JAK1                                                                                                                    | E2F1, LOC101750560                                                                                                                                 | Pancreatic cancer (ko05212)                    | 0.02477662  |
| 8                                                                                                 | PIK3CA, LOC107056430, PDGFRA, PIK3CG, LOC107056858, FGF7                                                                                               | E2F1, LOC101750560                                                                                                                                 | Melanoma (ko05218)                             | 0.02656947  |
| 8                                                                                                 | PIK3CA, LOC107056430, PIK3CG, PDGFRA                                                                                                                   | PYGO2, E2F1, LOC101750560, CABP2                                                                                                                   | Glioma (ko05214)                               | 0.03668416  |
| 8                                                                                                 | PIK3CA, LOC107056430, PIK3CG, TGFBR1                                                                                                                   | SASH3, PYGO2, E2F1, LOC101750560                                                                                                                   | Chronic myeloid leukemia (ko05220)             | 0.03810799  |
| DEGs associated with metabolic pathways (at 12h post saline/LPS treatment)                        |                                                                                                                                                        |                                                                                                                                                    |                                                |             |
| 14                                                                                                | ATP5A1W, ATP12A                                                                                                                                        | ATP5D, LOC107056507, SDHC, LOC107049545, NDUFA13, ATP5G2, NDUFA2, Dock11, LOC107049047, COX5A                                                      | Oxidative phosphorylation (ko00190)            | 0.00017938  |
| 5                                                                                                 | ALDH1A3, IL4I1,                                                                                                                                        | LOC107056850, MIF, LOC107049269                                                                                                                    | Phenylalanine metabolism (ko00360)             | 0.001328849 |
| 4                                                                                                 | -----                                                                                                                                                  | LSS, SC5D, LOC100857622, LOC107056717                                                                                                              | Steroid biosynthesis (ko00100)                 | 0.009269242 |
| 4                                                                                                 | -----                                                                                                                                                  | CHURC1, LOC107055323, FDPS, LOC107049309                                                                                                           | Terpenoid backbone biosynthesis (ko00900)      | 0.01784414  |
| 4                                                                                                 | GSTA3, ALDH1A3                                                                                                                                         | LOC107050491, LOC107056196                                                                                                                         | Drug metabolism - cytochrome P450 (ko00982)    | 0.04348163  |

| DEGs associated with all significant pathways<br>(at 36h post saline/LPS treatment) |                                                     |                                                         |                                                        |             |
|-------------------------------------------------------------------------------------|-----------------------------------------------------|---------------------------------------------------------|--------------------------------------------------------|-------------|
| 3                                                                                   | LOC107049120, YF6,<br>LOC768350                     | -----                                                   | Graft-versus-host disease<br>(ko05332)                 | 0.000271798 |
| 3                                                                                   | LOC107049120, YF6,<br>LOC768350                     | -----                                                   | Allograft rejection (ko05330)                          | 0.000503261 |
| 5                                                                                   | LOC107049120, YF6,<br>LOC768350, BG2                | THBS1                                                   | Phagosome (ko04145)                                    | 0.000544606 |
| 3                                                                                   | LOC107049120, YF6,<br>LOC768350                     | -----                                                   | Antigen processing and<br>presentation (ko04612)       | 0.000688693 |
| 3                                                                                   | LOC107049120, YF6,<br>LOC768350                     | -----                                                   | Primary immunodeficiency<br>(ko05340)                  | 0.000730337 |
| 3                                                                                   | LOC107049120, YF6,<br>LOC768350                     | -----                                                   | Autoimmune thyroid disease<br>(ko05320)                | 0.001049398 |
| 3                                                                                   | LOC107049120, YF6,<br>LOC768350                     | -----                                                   | Natural killer cell mediated<br>cytotoxicity (ko04650) | 0.00364005  |
| 3                                                                                   | LOC107049120, YF6,<br>LOC768350                     | -----                                                   | T cell receptor signaling<br>pathway (ko04660)         | 0.00433848  |
| 4                                                                                   | LOC107049120, YF6,<br>LOC768350, BG2                |                                                         | Endocytosis (ko04144)                                  | 0.004680683 |
| 3                                                                                   | LOC107049120, YF6,<br>LOC768350                     | -----                                                   | Hematopoietic cell lineage<br>(ko04640)                | 0.007984066 |
| 3                                                                                   | LOC107049120, YF6,<br>LOC768350                     | -----                                                   | Herpes simplex infection<br>(ko05168)                  | 0.008757677 |
| 4                                                                                   | LOC107049120, YF6,<br>LOC768350                     | THBS1                                                   | Cell adhesion molecules<br>(ko04514)                   | 0.009543652 |
| 3                                                                                   | LOC107049120, YF6,<br>LOC768350                     | -----                                                   | Viral carcinogenesis<br>(ko05203)                      | 0.01212585  |
| 3                                                                                   | LOC107049120, YF6,<br>LOC768350                     | -----                                                   | Epstein-Barr virus infection<br>(ko05169)              | 0.01801051  |
| DEGs associated with all significant pathways<br>(at 72h post saline/LPS treatment) |                                                     |                                                         |                                                        |             |
| 4                                                                                   | -----                                               | LOC769899, AVD, AVR2, LOC768350                         | Graft-versus-host disease<br>(ko05332)                 | 0.000462069 |
| 4                                                                                   | -----                                               | LOC769899, AVD, AVR2, LOC768350                         | Allograft rejection (ko05330)                          | 0.001016396 |
| 6                                                                                   | CTGF, CYR61                                         | LOC769899, AVD, AVR2, LOC768350                         | Hematopoietic cell lineage<br>(ko04640)                | 0.001108016 |
| 4                                                                                   | -----                                               | LOC769899, AVD, AVR2, LOC768350                         | Antigen processing and<br>presentation (ko04612)       | 0.001513009 |
| 4                                                                                   | -----                                               | LOC769899, AVD, AVR2, LOC768350                         | Primary immunodeficiency<br>(ko05340)                  | 0.001629486 |
| 4                                                                                   | LOC100857334, LOC770025,<br>LOC107049046, 107055485 | -----                                                   | Ribosome (ko03010)                                     | 0.001710519 |
| 6                                                                                   | -----                                               | LOC769899, AVD, AVR2, LOC768350,<br>LOC107055757, HNRPK | Viral carcinogenesis<br>(ko05203)                      | 0.002413858 |
| 5                                                                                   | FOS                                                 | LOC769899, AVD, AVR2, LOC768350                         | T cell receptor signaling<br>pathway (ko04660)         | 0.002489395 |
| 4                                                                                   | -----                                               | LOC769899, AVD, AVR2, LOC768350                         | Autoimmune thyroid disease<br>(ko05320)                | 0.002569968 |
| 7                                                                                   | CTGF, CYR61, LOC100857858                           | LOC769899, AVD, AVR2, LOC768350                         | Phagosome (ko04145)                                    | 0.003478134 |
| 4                                                                                   | -----                                               | LOC769899, AVD, AVR2, LOC768350                         | Natural killer cell mediated<br>cytotoxicity (ko04650) | 0.01183826  |
| 2                                                                                   | -----                                               | LOC107052718, LOC107052719                              | Folate biosynthesis (ko00790)                          | 0.01851986  |
| 5                                                                                   | CTGF, FOS, LOC107049866,<br>LOC107049603, CYR61     | -----                                                   | Osteoclast differentiation<br>(ko04380)                | 0.03108378  |
| 6                                                                                   | CTGF, CYR61                                         | LOC769899, AVD, AVR2, LOC768350                         | Cell adhesion molecules<br>(ko04514)                   | 0.03301481  |
| 2                                                                                   | FOS, LOC769000                                      | -----                                                   | Colorectal cancer (ko05210)                            | 0.03620476  |
| 5                                                                                   | LOC769000                                           | LOC769899, AVD, LOC768350, AVR2                         | Endocytosis (ko04144)                                  | 0.04666407  |

### Analysis of bursal morphology and ultrastructure after LPS treatment

H&E stained BF sections from LPS treated chicks

showed infiltration of eosinophilic heterophils and increased number of nucleated oval shaped RBCs in or near blood vessels in chicken bursa at 12, 36 and 72 h time points (Figure 2A). The enhanced heterophilic granules accumulated in the medulla of bursal follicle and

disrupted the outer boundary of bursal follicular cortex at 36 h post LPS stimulation (Figure 2A). Scanning electron micrographs showed distribution of disc-shaped polygonal epithelial cells on the mucosal surface of chicken bursa

(Figure 2B). LPS stimulation also caused severe erosion and breaks of the mucosal membrane at 12 h and complete exuviation of bursal mucosal epithelial cells at 36 h. However, slight restoration of the disrupted mucosal

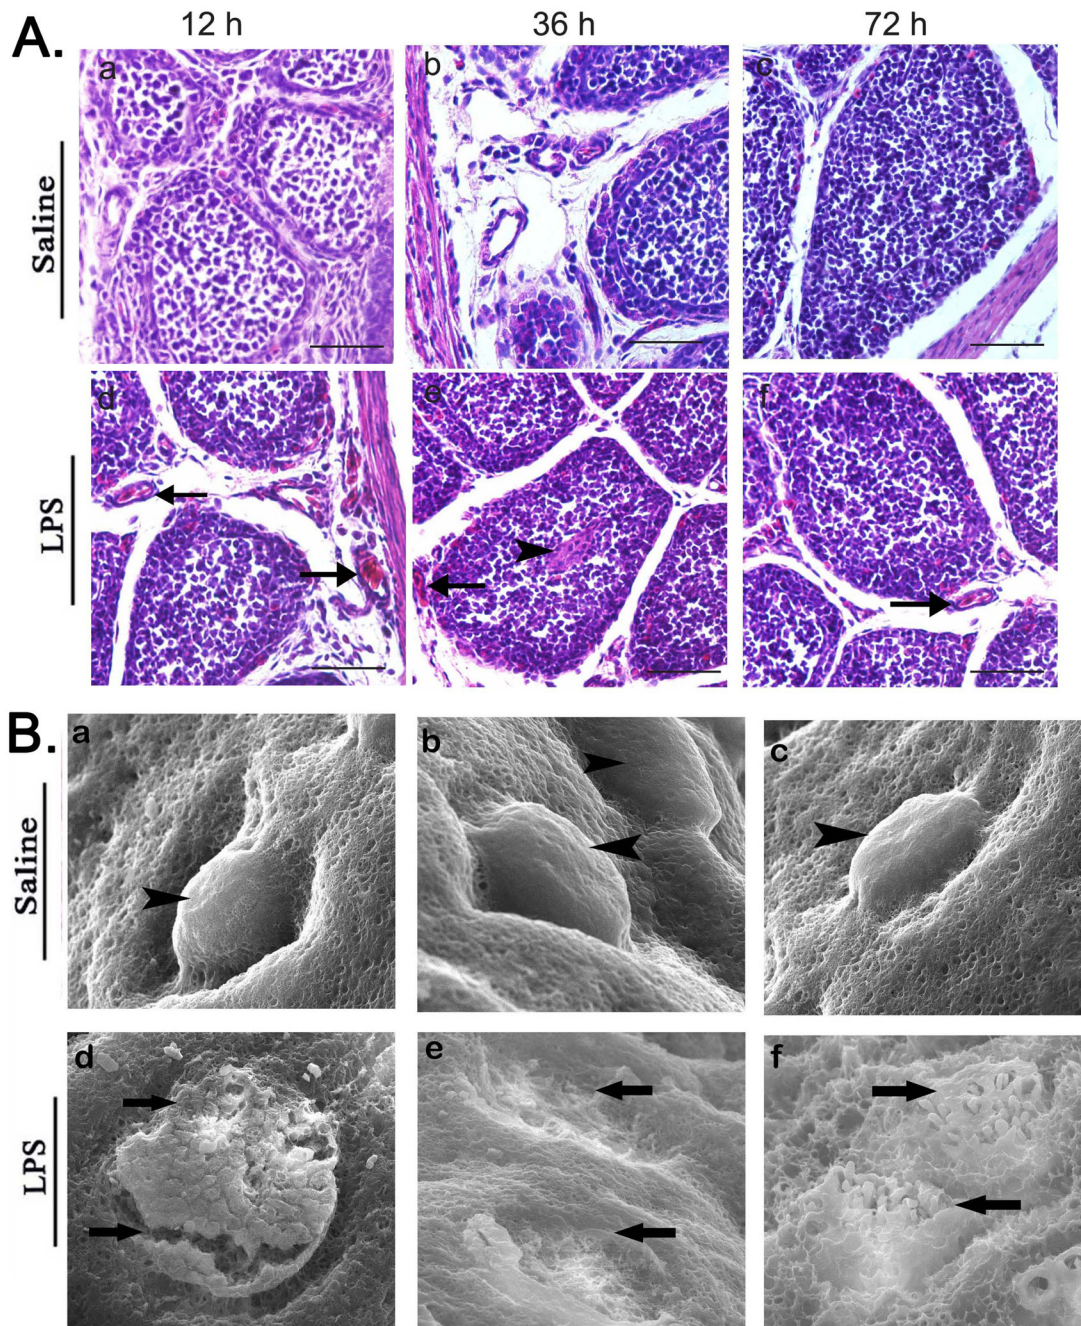

**Figure 2: Analysis of bursal morphology after LPS treatment.** **A.** Representative images of H&E stained BF tissue sections at 12, 36 and 72 h after saline (control) or LPS i.p. injection. As shown, BF specimens from LPS-treated chicks show histopathological changes compared to the control. Arrows indicate blood vessel and arrow heads represent accumulation of RBC or inflammatory cells. Note: Scale bars = 50  $\mu$ m. **B.** Representative scanning electron micrographs of BF sections at 12, 36 and 72 h after saline (control) or LPS i.p. injection showing the ultra structure of BF mucosal surface. Bursa tissue sections in LPS stimulated group show severe erosion and breaks in mucosal surface at 12 h, complete exuviation of bursal mucosal epithelial cells at 36 h and slight restoration of the disrupted mucosal surface at 72 h. Magnification = 500x. Arrowheads represent normal, smooth and intact bursal follicles on mucosal surface in saline group while arrows indicate broken, eroded and sloughed mucosal surface in LPS stimulated group. Data represent at least five tissue sections per chick per group ( $n = 3$  at each time point).

**Table 2: KEGG orthology and GO Terms associated with selected differentially expressed genes (DEGs)**

| DEGs         | Aliases                 | Gene product                                                            | Log value  | GO term/s                                                                                                                          | KEGG Orthology                                                                                                                                       |                                   |
|--------------|-------------------------|-------------------------------------------------------------------------|------------|------------------------------------------------------------------------------------------------------------------------------------|------------------------------------------------------------------------------------------------------------------------------------------------------|-----------------------------------|
| BPI          | LBP, BPIFD2             | bactericidal/permeability-increasing protein                            | 2.666167   | -----                                                                                                                              | K05399; lipopolysaccharide-binding protein                                                                                                           |                                   |
| PIK3CG       | PI3CG, PI3K, p120-PI3K  | phosphatidylinositol-4,5-bisphosphate 3-kinase, catalytic subunit gamma | 1.784928   | -----                                                                                                                              | K00922; phosphatidylinositol-4,5-bisphosphate 3-kinase                                                                                               |                                   |
| TLR2A        | TLR2, CD282, TIL4       | toll-like receptor 2 family member A                                    | 1.9210023  | GO:0038023, GO:0031224, GO:0006954, GO:0002224, GO:0001817, GO:0009607                                                             | K04440;c-Jun N-terminal kinase                                                                                                                       |                                   |
| MAPK9        | JNK/ JNK2- $\alpha$ 1   | mitogen-activated protein kinase 9                                      | 1.9210991  | -----                                                                                                                              | K04440; c-Jun N-terminal kinase                                                                                                                      |                                   |
| IFNGR1       | IMD27A, IMD27B, CD119   | interferon gamma receptor 1                                             | 2.2324337  | GO:0005515                                                                                                                         | K05132; interferon gamma receptor 1                                                                                                                  |                                   |
| USp53        | p53, TP53, BCC7, TRP53  | ubiquitin specific peptidase 53                                         | 4.4560819  | -----                                                                                                                              | K14206; solute carrier family 15 (oligopeptide transporter), member 1                                                                                |                                   |
| JUN-D        | AP-1, Jun-D             | jun D proto-oncogene                                                    | -1.5720083 | -----                                                                                                                              | K04449; transcription factor jun-D, K04440; c-Jun N-terminal kinase                                                                                  |                                   |
| SASH3        | CRK, CRKII, p38         | SAM and SH3 domain containing 3                                         | -1.5287857 | -----                                                                                                                              | K04438; proto-oncogene C-crk                                                                                                                         |                                   |
| HSP27        | HSPB1                   | heat shock protein family B (small) member 1                            | -3.2252416 | -----                                                                                                                              | K04455; heat shock protein beta-1                                                                                                                    |                                   |
| AVD          | MHC class 1             | Avidin                                                                  | 1.48434927 | -----                                                                                                                              | K06458; CD8A, K06459; CD8B, K06751; major histocompatibility complex, class I, K15214; TATA box-binding protein-associated factor RNA polymerase I-C |                                   |
| E2F          | RBP3                    | E2F transcription factor 1                                              | -1.3682659 | GO:0005515, GO:0044212, GO:0001071, GO:1901990, GO:0012501, GO:0008284, GO:1901990, GO:0012501, GO:0008284, GO:0000083             | GO:0001071, GO:0005515, GO:0044212, GO:0006974, GO:0043488, GO:0000083, GO:0006974, GO:0043488, GO:0007420, GO:0000083                               | K17454; transcription factor E2F1 |
| CNN1         | HEL-S-14, SMCC, Sm-Calp | calponin 1, basic, smooth muscle                                        | -3.3097164 | GO:0043232, GO:0008092, GO:0008092, GO:0030036                                                                                     | K15411, paired immunoglobulin-like type 2 receptor alpha, K04426; mitogen-activated protein kinase 5, K06712; butyrophilin, K06084; F-box protein 20 |                                   |
| LOC101750560 | Akt, akt1, PKB          | uncharacterized LOC101750560                                            | -1.6138883 | -----                                                                                                                              | K04456, RAC serine/threonine-protein kinase                                                                                                          |                                   |
| LOC107056430 | HRas, GTPas Ras, Ras    | GTPase HRas                                                             | 3.0362118  | GO:0012505, GO:0044444, GO:0017111, GO:0005515, GO:0043405, GO:0031346, GO:0009653, GO:0007569, GO:0012502, GO:0016601, GO:0007599 | GO:0043231, GO:0016020, GO:0032550, GO:0000075, GO:0031532, GO:0043410, GO:0010586, GO:0016477, GO:0007254, GO:0006935, GO:0007599                   | K02833; GTPase HRas               |

surface was observed at 72 h (Figure 2B).

### Increased apoptosis and decreased proliferation in bursa after LPS treatment

*In-situ* cell apoptosis in the bursa was analyzed by the formamide-MAb assay which recognizes damaged

single-strand DNA (ssDNA) in early apoptotic cells. We observed increased ssDNA in bursa from LPS treatment group compared to the control (Figure 3A). Integral optical density (IOD) of ssDNA expression in LPS treatment group was increased at 12 ( $P < 0.05$ ) and 36 h ( $P < 0.01$ ) (Figure 3A). TUNEL assay showed that bursal sections from LPS treatment group had increased number of TUNEL-positive cells compared to control. High IOD

value at 36h confirmed increased apoptotic cells in bursa from LPS-treated chicks compared to control (Figure 3B). Further, immunohistochemical analysis showed low

PCNA expression in LPS group compared to the control group at 12 and 36 h ( $P < 0.05$ ) suggesting decreased cell proliferation upon LPS treatment (Figure 3C).

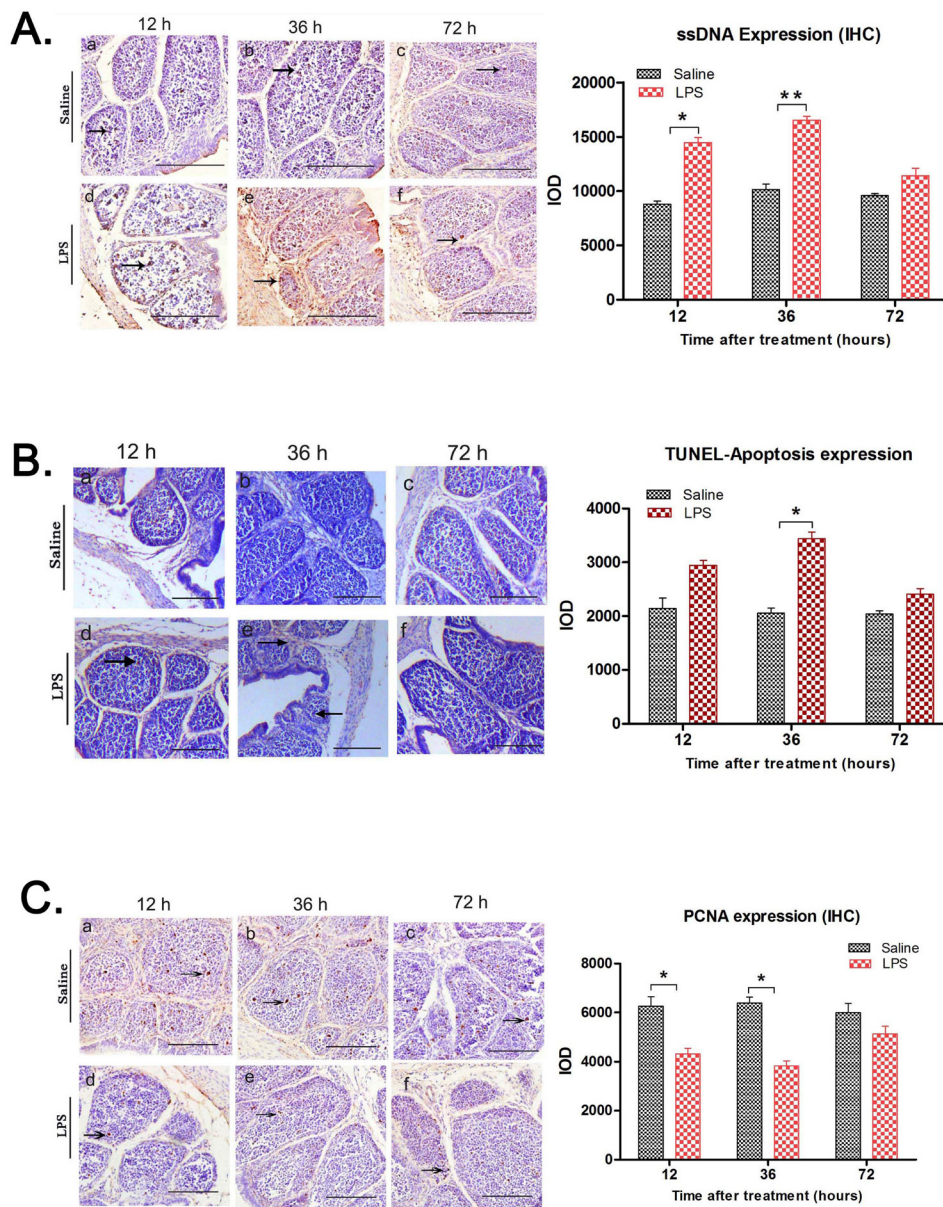

**Figure 3: LPS treatment upregulates apoptosis and inhibits proliferation in chick BF.** **A.** Representative images of immunostaining with anti-ssDNA monoclonal antibody of BF tissue sections at 12, 36 and 72 h after saline (control) or LPS i.p. injection. Arrows show single stranded DNA (ssDNA) staining as a dark brown product (arrows). Integral optical density (IOD) analysis showed that in comparison to the saline group, ssDNA expression was upregulated in LPS treated group, especially at 12 (IOD ratio saline vs LPS; 8801:14453.67) and 36 h (IOD ratio saline vs LPS; 10135:16781.5). **B.** Representative images of TUNEL assay of BF tissue sections at 12, 36 and 72 h after saline (control) or LPS i.p. injection. Scale bars = 100  $\mu$ m. IOD analysis shows increased TUNEL- positive (apoptotic) cells with brown stained nuclei in BF from LPS-treated chicks, especially at 36h time point (IOD ratio saline vs LPS; 2054.67:3439.67). **C.** Scale bars = 50 $\mu$ m. Serial tissue sections of chicken bursa of Fabricius were immuno-stained with PCNA antibody (proliferation marker) at 0h, 12 h, 36 h and 72 h post saline (control) or LPS stimulation **C.** Representative images of immunohistochemical staining of PCNA (proliferation) in BF tissue sections at 12, 36 and 72h after saline (control) or LPS i.p. injection. Arrows show PCNA positive signals as light brown dots. PCNA expression was downregulated in LPS treatment group compared to control. Integral optical density (IOD) of PCNA expression significantly decreased at 12 (IOD ratio saline vs LPS; 6266.67:4310) and 36 h (IOD ratio saline vs LPS; 6390:3822) after LPS treatment. Scale bars = 100 $\mu$ m; Note: \* denotes  $P < 0.05$ ; \*\* denotes  $P < 0.01$ . Data represent microscopic examination of at least five tissue sections per chick per group ( $n = 3$  at each time point).

**Table 3: QRT-PCR primer list**

| Gene Symbol | Genbank Accession Number | Oligonucleotide sequence(5'to3') |                        |
|-------------|--------------------------|----------------------------------|------------------------|
|             |                          | Forward                          | reverse                |
| AvBD2       | NM_001201399.1           | TTCTCCAGGGTTGTCTTCGC             | TGCATTCCAAGGCCATTTGC   |
| ZNF217      | XM_015296520.1           | CCACTGATGTACGAGAGTGCT            | TACAAAAATGGGGCAGGTGCT  |
| BPI         | XM_417465.5              | ATCTGGCCACATCGTAGGGA             | CGTCAGCTTTATCTGCGCTC   |
| MAPK9       | NM_205095.1              | ATGAGTGACAGTAAATGCGA             | TCGCATTACTGTCACTCAT    |
| PIK3CG      | XM_015275714.1           | ATGGAGTTGGGTGACTATGA             | TCATAGTCACCCAACCTCCAT  |
| DOCK10      | XM_015277024.1           | ATGGGTTGTGCTGCCAGCAT             | ATGCTGGCAGCACAACCCAT   |
| IFNGR1      | NM_001130387.1           | ATGGCCGAGCGCCGCGTGCC             | GGCACGCGGCGCTCGGCCAT   |
| AVD         | NM_205320.1              | ACACCATCAACAAGAGGACCC            | AAGATGTTGATGCCGACCCT   |
| TLR4        | NM_001030693.1           | TGAAAGAGCTGGTGGAACCC             | CCAGGACCCGAGCAATGTCAA  |
| MyD88       | NM_001030962.2           | AGGATGGTGGTCGTCATTTC             | TTGGTGCAAGGATTGGTGTA   |
| NF-κB       | NM_001030962.2           | CTACTGATTGCTGCTGGAGTTG           | CTGCTATGTGAAGAGGCGTTGT |
| HRAS        | NM_205292.1              | TAGAAACGTCGGCCAAAACC             | CCACTTCATCTGGTGGGTT    |
| FOS         | NM_205508.1              | CCCGTCAACTCGCAGGATTT             | CGGCGGATCCTCCTCTTTTC   |
| Jun-D       | XM_015300148.1           | CCCATCGATATGGACACGCA             | TCCTGAGCGGCGTTTTTACT   |
| β-actin     | NM_205518.1              | TTGTTGACAATGGCTCCGGT             | TCTGGGCTTCATCACCAACG   |

### Identification of differential expressed genes (DEGs) in bursa after LPS stimulation

The RNA-seq statistics pertaining to the average total reads, mapping reads and unique matching for each of the 18 samples are shown in Figure 4A. The differentially expressed genes (DEGs) between LPS and control (saline) group were analyzed by Random-Sampling Empirical Myerson (RSEM) software. Overall, there were 736 DEGs with 417 downregulated and 319 upregulated genes at all the three time points (12, 36 and 72 h; Figure 4B). Among these, we observed 637 DEGs (387 downregulated and 250 upregulated) at 12 h (Figure 4C), 24 DEGs (12 downregulated and 12 upregulated) at 36h and 75 DEGs (18 downregulated and 57 upregulated) at 72 h (Supplementary Table 1). Maximum DEGs were observed at 12 h time point. The top ten upregulated and downregulated DEGs at 12h are shown in Figure 4D. To validate the RNA-seq data, eight genes (AvBD2, ZNF217, BPI, MAPK9/JNK, AVD, IFNGR, PIK3CG, DOCK10) were randomly selected at 12h for qRT-PCR analysis, which confirmed the RNA-seq findings. Moreover, there was high correlation between qRT-PCR and RNA-seq data ( $r = 0.954$ ; Figure 4E).

### Bioinformatics analysis of DEGs

GO annotation of DEGs was performed at all the time points (12 h, 36 h and 72 h). All the DEGs were enriched in all three major GO classes, namely, biological process, cellular component and molecular function.

Moreover, most DEGs were enriched in GO terms at 12 h. At 12 h, 992 genes were annotated in biological processes, 631 genes in cellular components and 257 genes in molecular function (Figure 5A). The top three enriched biological processes were cellular (139 genes), metabolic (120 genes) and single-organism (119 genes) processes (Figure 5B). The top three enriched cellular components were cell (141 genes), cell part (141 genes) and organelle part (108 genes) (Figure 5B). The top three enriched molecular function categories were binding (130 genes), catalytic activity (76 genes) and structural molecule activity (13 genes) (Figure 5B). KEGG enrichment analysis of DEGs at 12 h showed enrichment of 135 DEGs in cellular processes, 118 in environmental information system, 84 in genetic information processing, 324 human diseases, 158 metabolism and 213 organismal system related to the signaling pathways (Figure 5C). The details of these DEGs in each signaling pathway are listed in Supplementary Tables 1 and 2.

### TLR4-MAPK-NF-κB/AP-1 signaling pathway mediates acute bursal atrophy

Integrated pathway analysis was performed for the DEGs in the KEGG database ([http://www.kegg.jp/kegg/tool/map\\_pathway2.html](http://www.kegg.jp/kegg/tool/map_pathway2.html)). A number of DEGs were involved in TLR4-MAPK signaling pathway including TLR4, BPI, PI3K, AKT, MAPK9 genes. Also, inflammatory factors such as IL13-RA2, IL2-RA, IL1-RL1, IL4-I1, IL15 DOCK2, DOCK10 and DOCK11 were differentially expressed. These inflammatory factors also



induce apoptosis. Therefore, we identified TLR4-MAPK-NF- $\kappa$ B/AP-1 as the key signaling pathway mediating acute bursal atrophy during LPS treatment (Figure 6A). Moreover, we validated the expression of the key genes involved in this signaling pathway. TLR4 was upregulated

and constitutively localized in the cortico-medullary regions and follicular medulla at 12 and 36h ( $P < 0.05$ ; Figure 6B). Similarly, NF- $\kappa$ B was upregulated at 12 and 36h ( $P < 0.05$ ; Figure 6C). Moreover, qRT-PCR results showed that TLR4, MyD88, NF- $\kappa$ B, HRas and sub-units

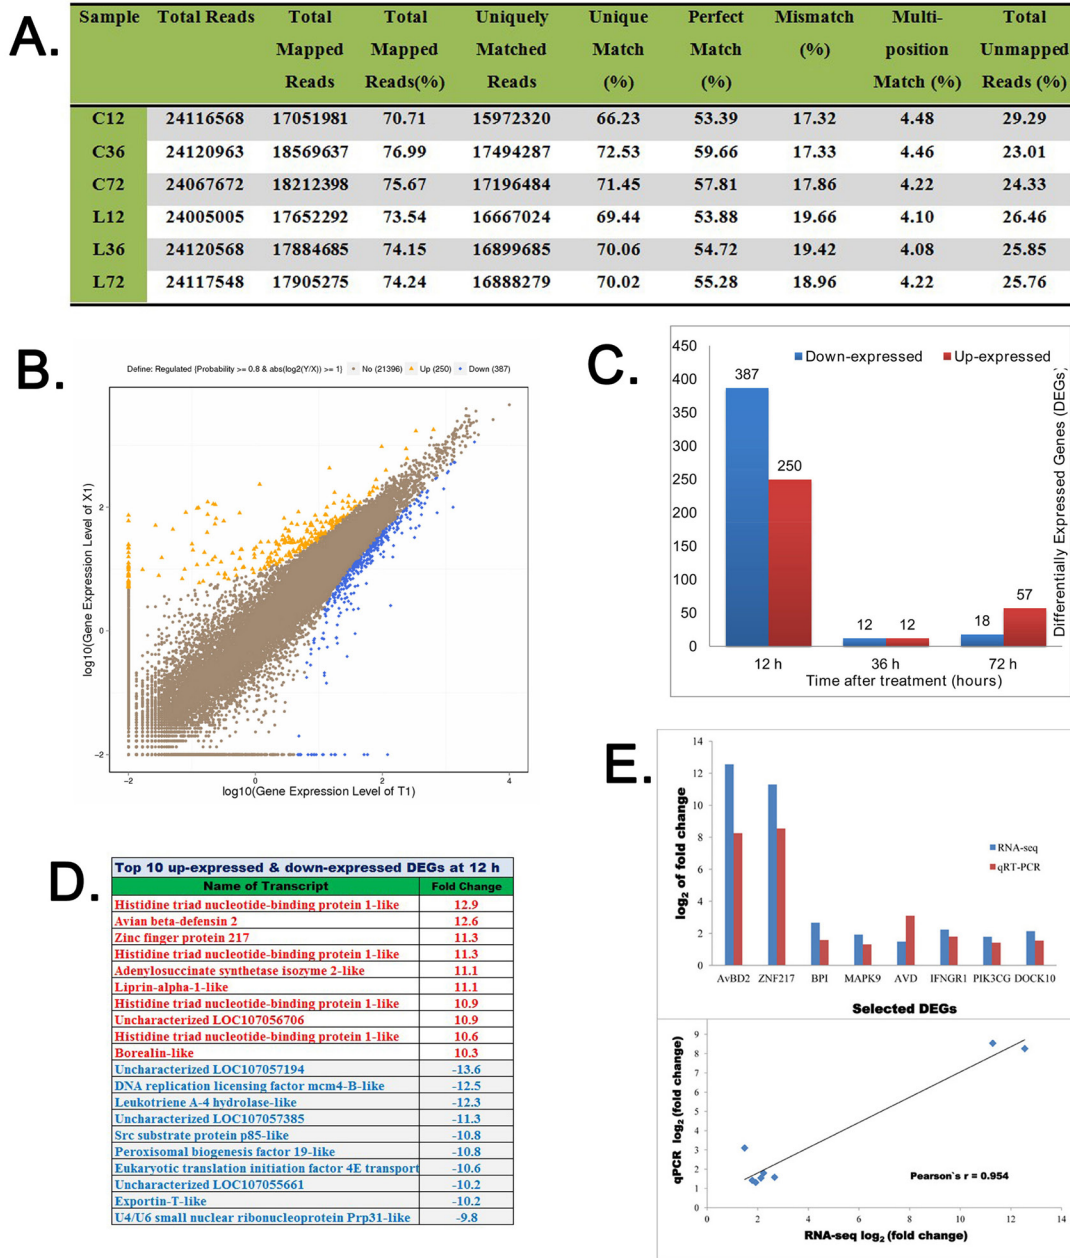

**Figure 4: Analysis and validation of differentially expressed genes in LPS-treated chicken bursa.** **A.** Statistics of high-throughput sequencing reads aligned against reference genome. **B.** Scatter plot diagram showing log value of gene expression of LPS-treated BF samples (Y-axis) versus and log value of gene expression of saline treated BF samples (X-axis). The blue color indicates downregulated genes, orange color represents upregulated genes and brown color designates unchanged genes. Top legends on each figure show statistics of screening threshold values. **C.** The diagram shows total numbers of differential expressed genes (DEGs) at 12, 36 and 72h after saline or LPS treatments. **D.** Top 10 up-regulated and down-regulated DEGs at 12 h post saline or LPS treatments. The plus numbers designate upregulated log values while negative numbers represent downregulated log values of DEGs. **E.** Comparison and correlation analysis of  $\log_2$  values of differential gene expression of eight genes (AvBD2, ZNF217, BPI, MAPK9, AVD, IFNGR1, PIK3CG and DOCK10) assessed by RNA-seq and qRT-PCR experiments.

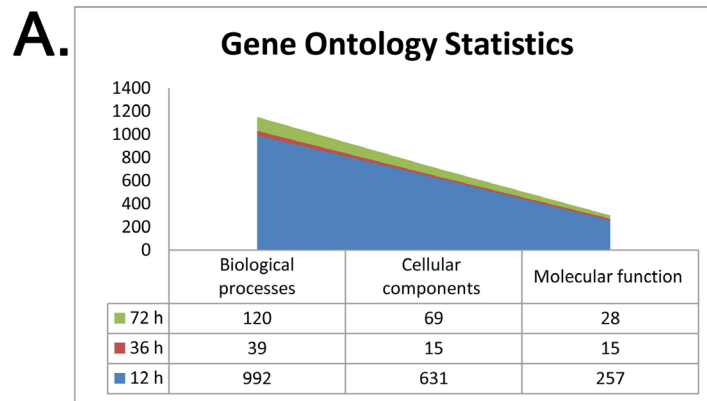

**B. GO Terms at 12 h (Saline vs LPS)**

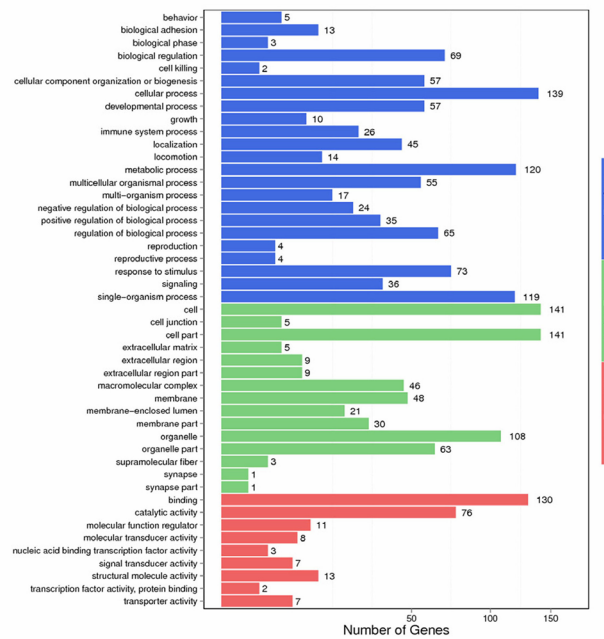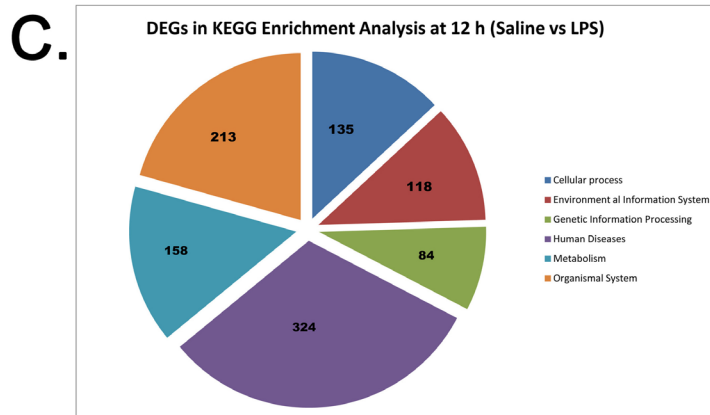

**Figure 5: Gene Ontology (GO) and KEGG functional pathway analysis of DEGs in LPS-treated chicken bursa. A.** Gene Ontology (GO) statistical analysis in chicken bursa of Fabricius at 12, 36 and 72 h time points of RNA seq data from saline and LPS-treated chicken bursal samples. **B.** Diagram showing GO terms and their designated number of DEGs at 12 h post saline or LPS treatment chicken BF samples. X-axis shows number of DEG while Y-axis represents GO terms. Three different colors designate three ontologies of GO terms; blue color represents biological process, green color indicates cellular components and the red color shows molecular functions. **C.** Diagram showing number of DEGs involved in KEGG enrichment analysis at 12 h post saline or LPS treatment in chicken BF samples.

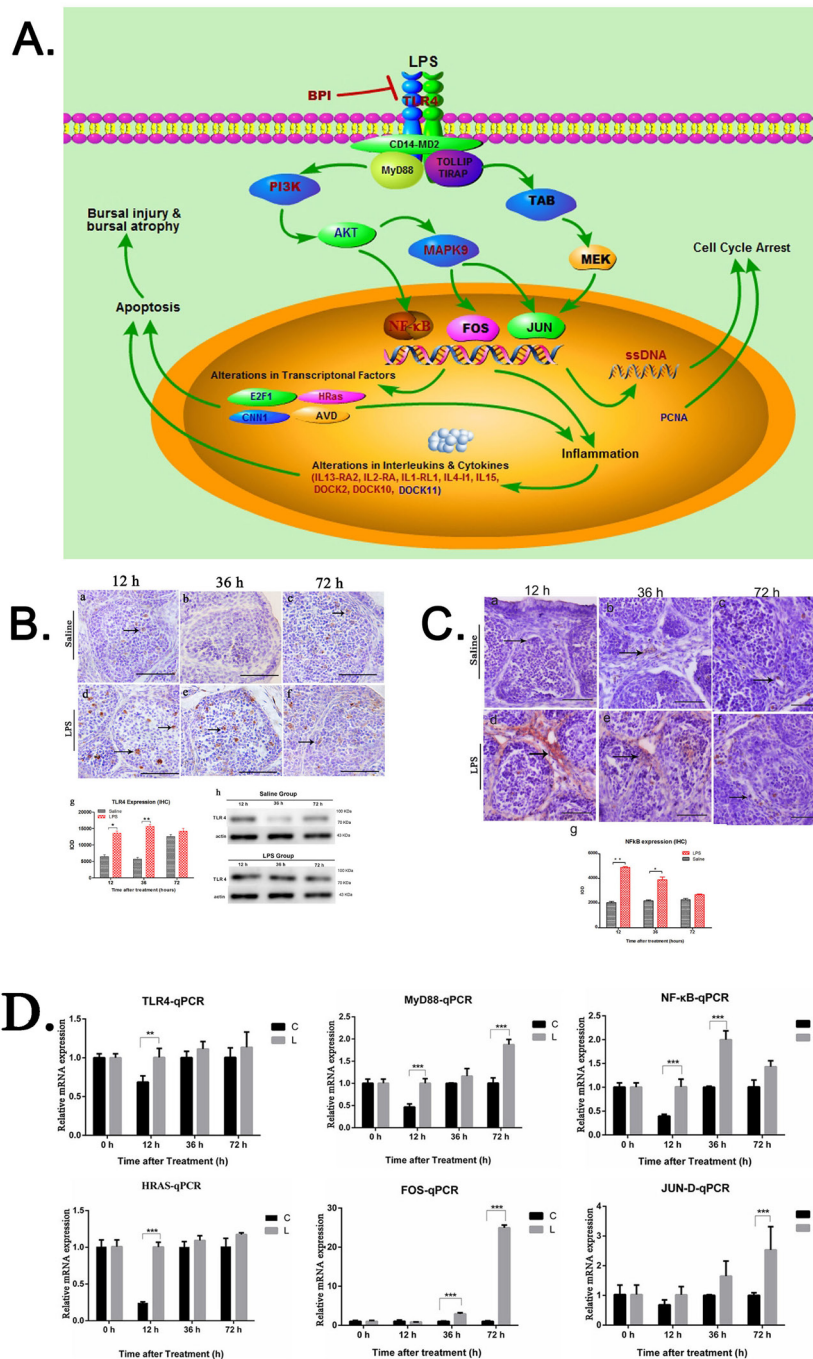

**Figure 6: Functional pathway analysis and graphical illustration of molecular mechanism of LPS induced bursal atrophy.** **A.** Diagram showing TLR4-MAPK-NF-κB/AP-1 pathway analysis of differentially regulated genes in LPS-treated BF. The red colored text represents upregulated genes; blue designates downregulated genes and black designates neighboring genes in TLR4-MAPK-NF-κB/AP-1 pathway in chicken bursa of Fabricius at early time point. The figure was drawn in Pathway Builder Tool. 2 software. **B.** Representative images of immunostained BF sections from LPS and saline control group chicks using anti-TLR4 antibody at 12, 36 and 72 h time points. As seen, TLR4 expression is enhanced in the LPS treated BF compared to control. Integral optical density (IOD) shows increased TLR4 expression at 12 and 36 h after LPS treatment. Scale bars = 50μm. Note: \* denotes  $P < 0.05$ ; \*\* denotes  $P < 0.01$ . Data represent microscopic examination of at least five tissue sections per chick per group ( $n = 3$  at each time point). Also shown are immunoblots showing increased TLR4 expression in LPS-treated BF compared to control. **C.** Representative images of immunostained BF sections from LPS and saline control group chicks using anti-NFκB-p50 antibody at 12, 36 and 72 h time points. IOD analysis shows increased NFκB expression at all 3 time points in LPS-treated BF (arrows) compared to control. Scale bars = 50μm. \* denotes  $P < 0.05$ ; \*\* denotes  $P < 0.01$ . Data represent microscopic examination of at least five tissue sections per chick per group ( $n = 3$  at each time point). **D.** QRT-PCR analysis of TLR4, MyD88, NFκB, HRas, FOS and JUN-D mRNA expression at 12, 36 and 72 h post LPS treatment as validation of key components of TLR4-MAPK-NF-κB/AP-1 pathway.

of AP-1 (FOS and Jun-D) were significantly up-regulated 12, 36 and 72 h after LPS treatment (Figure 6D).

## DISCUSSION

Acute atrophy of bursa is observed in various infectious diseases including *Salmonella* infection. In the present study, we found that LPS stimulation markedly reduced bursal weight and index. Also, the structural integrity of bursa was disrupted due to inflammation. We also identified that TLR4-MAPK-NF- $\kappa$ B/AP-1 signaling pathway played an important role in acute atrophy of bursa induced by LPS.

In this study, we observed morphological manifestation of atrophy at 36 h after LPS treatment. However, in regards to gene expression changes, the most significant time point was 12 h. Therefore, the molecular response to the LPS stimulation was earlier than the appearance of the morphological atrophy phenotype. In our previous study, we found thymus atrophy at 36 h and gene expression changes at 12 h after LPS treatment [14, 15]. Therefore, both bursa and thymus show similar phenotype changes in response to LPS treatment. In addition, there were no significant changes in bursal weight between LPS treatment and control group at 72 h and 120 h suggesting compensatory growth after atrophy in the LPS treatment group. SEM results showed that the structure of bursa was disrupted at 12 h and damaged considerably at 36 h after LPS treatment. However, it recovered at 72 h, but was not completely restored at 120 h. In a previous study, reduction in feeding efficiency and growth performance along with compensatory growth mechanism was observed in broiler chicks following LPS challenge [31]. Therefore, although the weight of bursa was similar to the control group at 72 h, its function was not fully restored.

We also observed increased apoptosis and decreased proliferation at 12 and 36 h after LPS treatment, which resulted in the bursal atrophy. Many studies have confirmed that inflammation induces cellular apoptosis [32-34]. In our previous study in chicken, inflammation induced apoptosis in thymus at 12, 36 and 72 h after LPS treatment [14, 15]. In the present study, we observed infiltration of eosinophilic heterophils and nucleated oval shaped RBCs in or near blood vessels in chicken bursa at 12, 36 and 72 h time points. Enhanced heterophilic granules accumulated in the medulla of bursal follicle at 36 h post LPS stimulation. Moreover, RNA-seq results showed upregulation of a number of inflammatory factors after LPS treatment. All these results indicated that inflammation due to LPS resulted in cellular apoptosis lead to bursal atrophy.

The RNA-seq data showed that many DEGs were significantly enriched in immune response pathways. Also, integrated pathway analysis revealed that TLR4-MAPK-NF- $\kappa$ B/AP-1 was the major pathway responsible

for atrophy of bursa induced by LPS. The expression of major genes in this signaling pathway, including TLR4, MAPK9, NF- $\kappa$ B and Fos/Jun (two subunits of AP-1) were significantly up-regulated after LPS treatment. Previous studies have confirmed that TLR4 is the receptor of LPS [35-37]. TLR4 is required for inflammatory responses after intravenous LPS injection [38]. MAPK9 is induced and activated by TLR4 with mediation by PI3K/AKT phosphorylated kinases [39, 40].

Moreover, NF- $\kappa$ B and AP-1 are induced and activated by MAPK and MEK [41, 42]. NF- $\kappa$ B and AP-1 are two key transcriptional factors for inflammation, which induce expression of inflammatory factors including IL-1, IL-6 and TNF- $\alpha$  [43, 44]. Also, c-Fos and c-Jun transcriptional factors are regulated by NF- $\kappa$ B and AP-1 [45, 46]. Moreover, these transcriptional factors participated in cellular apoptosis and inflammation [47]. Therefore, our findings show that the TLR4-MAPK-NF- $\kappa$ B/AP-1 pathway is the major signaling pathway mediating inflammation and bursal atrophy after LPS treatment in chicken.

In conclusion, our study demonstrates that LPS treatment induces TLR4-MAPK-NF- $\kappa$ B/AP-1 signaling pathway resulting in increased inflammation and apoptosis in the bursa, thereby leading to its atrophy.

## MATERIALS AND METHODS

### Ethics statement

The present study was approved by the Animal Care and Use Committee of Huazhong Agricultural University (HZAU), Wuhan, China.

### Experimental design and lipopolysaccharide (LPS) stimulation

Healthy one-day-old Cobb strain broiler chicks were obtained from a local breeding company (Zhengda, Wuhan, China). The chicks were reared under a conventional housing environment similar to commercial broiler husbandry conditions. Water and feed were provided *ad libitum* without any medication and vaccination. In a separate study, the effect of different doses of LPS (i.e., 12.5, 25 and 50 mg/kg b.w.) on bursa weight was determined. In the present study, the chicks were intraperitoneally (i.p.) injected with 50mg/kg *salmonella* LPS (L7261; Sigma-Aldrich, St. Louis, MO, USA) in 0.5ml saline (0.75 % NaCl solution); control chicks received only 0.5ml saline i.p.

## Bursal tissue harvesting

The chicks were sacrificed at various time points and the BF were harvested and weighed. The bursal index (BI) was calculated as

$$\text{Bursal index} = \text{BF weight (g)} / \text{body weight (g)} \times 1000$$

Six tissue samples were collected for each experimental treatment group (LPS or saline) at 0, 2, 6, 12, 36, 72 and 120 hours post saline and LPS treatments. Tissues were snap frozen in liquid nitrogen and then preserved at -70 °C for RNA-seq and other experiments. Tissue samples were also fixed in 2.5% glutaraldehyde solution at 4°C for scanning electron microscopy (SEM). For histological examination, tissue samples were fixed in 4% paraformaldehyde at room temperature, dehydrated and then embedded in paraffin wax. Then, 5µm serial tissue sections were cut using a Leica microtome (Nussloch GmbH, Germany) and mounted on polylysine-coated slides (Boster Corporation, China). The tissue sections were dried at 37°C overnight.

## Hematoxylin and eosin (H&E) staining

Briefly, bursal specimens were deparaffinized in xylene and rehydrated in a graded series of decreasing ethanol concentrations. The sections were stained in Harris hematoxylin solution (Baso, China) for 4 min, counterstained in eosin solution, dehydrated with ascending concentrations of ethanol, cleared in xylene, and fixed by mounting a cover slip using neutral balsam. Stained tissue sections were examined by light microscopy (Olympus BX51, Tokyo, Japan) with a digital camera (DP72; Olympus).

## Scanning electron microscopy (SEM)

Scanning electron microscopy (SEM) was performed as previously described [48]. Briefly, BF tissues were post-fixed in osmium tetroxide (OsO<sub>4</sub>), then washed in 0.1M cacodylate buffer and dehydrated in ascending acetone concentrations. Bursal tissues were then impregnated with pure hexamethyldisilazane (HMDS) (Sigma-Aldrich, St. Louis, USA) and air dried. After drying, the samples were mounted on aluminum stubs, coated with a layer of gold sputter coater and viewed in a scanning electron microscope (Hitachi SU8010).

## Immunohistochemical staining

Immunohistochemical staining of BF sections was carried out using antibodies against proliferative cell nuclear antigen (PCNA) (1:200), TLR4 (1:100) and NF-κB-p50 (1:250) (Santa Cruz Biotechnology, Inc., Santa

Cruz, CA, USA) following previously described methods [49]. Formamide-monoclonal antibody (MAB) assay was performed with the anti-ssDNA monoclonal antibody (1:20; EMD Millipore, Billerica, USA) as previously described [14, 15]. This assay differs from the traditional immuno-staining protocol by having an additional pre-treatment of bursal tissue sections with saponin (0.1mg/ml) and proteinase K (20µg/ml) in PBS at 37°C for 20 min, followed by incubation at 56°C for 20 min in formamide diluted 50% (v/v) with dd-H<sub>2</sub>O. Also, unlike the routinely used heat induced antigen retrieval in a micro oven, here the sections were treated with ice cold PBS for 5 min and then incubated with anti-mouse IgM SABC kit (Boster, Wuhan, China) in place of another standard secondary antibody kit. Hematoxylin was used for counterstaining.

## Analysis of bursal apoptosis by TUNEL Assay

TUNEL staining was carried out with the *In Situ* Cell Death Detection Kit-POD (Roche, Mannheim, Germany) according to previously described method [50]. Briefly, 5µm serial bursal tissue sections were deparaffinized in xylene and then rehydrated in descending concentrations of ethanol. Endogenous peroxidase activity was blocked with 3% H<sub>2</sub>O<sub>2</sub> for 10 min followed by Proteinase K treatment for 20 min. Then, the specimens were incubated with 1:20 diluted terminal deoxynucleotidyl transferase (TdT) in a reaction buffer (with fixed concentrations of digoxigenin-labeled nucleotides) for 90 min at 37-40°C in humidified chamber. After washing slides with Stop/Wash buffer, the tissue sections were again incubated with the pre-diluted anti-digoxin antibody (1:100) for 60 min at 37-40°C in humidified chamber. Tissue sections were then incubated with the 3, 3'-diaminobenzidine (DAB) chromogen (Boster, Wuhan, China) and counterstained with hematoxylin.

## Semi-quantitative analysis of protein expression in bursal tissue sections

A light microscope (BH-2; Olympus, Japan) with an attached digital camera (DP72; Olympus) was used for the examination of serial bursal tissue sections. The expression of positive signal was assessed under high-power fields at random. Same microscope with attached camera set was used for all the micrographs. Integral optical density (IOD) for positive staining was calculated using Image-Pro Plus (IPP) 6.0 software (Media Cybernetics, USA). GraphPad Prism software version 5.0 (GraphPad Software, Inc., San Diego, USA) was used for graphing the data.

## Western blot analysis

Western blotting was performed following previously described methods [51]. Briefly, the frozen specimens were powdered in liquid nitrogen and homogenized in lysis buffer with a protease inhibitor enzyme. The supernatants were vortexed, incubated on ice and centrifuged at  $12,000 \times g$  for 5 min. The protein concentrations were measured using BCA protein quantification kit (Vazyme™ biotech.co., ltd.). Equal amounts of total proteins (40  $\mu$ g) were subjected to 10% SDS-PAGE (30 min at 80 volts and after that 60 min at 100 volts). Then, the separated proteins were transferred onto a PVDF membrane (Merck Millipore, USA). The membranes were incubated against rabbit anti-TLR4 (A00017-Boster, 1:400) and anti-human  $\beta$ -actin (sc-47778-Santa Cruz, 1:1000) antibodies for 12 h and after washing in 1X TBST buffer thrice, were incubated with peroxidase conjugated secondary antibody (1:3000) for 30 min (Boster, China). The blots were developed with Super Signal West Pico Chemiluminescent Substrate (Thermo Fisher Scientific, Waltham, MA, USA) and visualized using ChemiDoc-It™ Imaging System.

## Quantitative real-time PCR (qRT-PCR)

Total RNA from bursal tissue samples was isolated using Trizol (Invitrogen, Carlsbad, CA, USA) following the manufacturer's instructions. The genomic DNA (gDNA) was removed by treating RNA with RNase-free DNase I (Fermentas, Opelstrasse, Germany). RevertAid First Strand cDNA Synthesis Kit (Fermentas, Opelstrasse, Germany) was used to synthesize of first strand cDNA. For qPCR, 10  $\mu$ l total reaction mixture was comprised of 5  $\mu$ l SYBR Select Master Mix for CFX (Applied Biosystems), 2  $\mu$ l of each forward and reverse primer and 1  $\mu$ l of template cDNA. The qPCR reactions were performed on a Bio-Rad CFX Connect real-time PCR detection system (Bio-Rad, Hercules, CA, USA). The qPCR conditions were as follows: pre-denaturation at 95 °C for 5 min, followed by 40 cycles of denaturation at 95 °C for 30 s, annealing at 60 °C for 30 s, and elongation at 72 °C for 20 s. All samples were run in triplicate and relative gene expression levels were quantified using the  $\Delta\Delta C_t$  method using  $\beta$ -actin as control. Primers sequences for qPCR are given in Table 3.

## RNA-seq and data analysis

TRIzol (Invitrogen, Carlsbad, CA, USA) was used to isolate total RNA from BF samples and the quality of RNA was assessed using Nanodrop spectrophotometer (Thermo, Waltham, MA, USA) and by gel electrophoresis. For high-throughput sequencing (RNA-seq), 18 BF RNA samples (three time points at 12, 36 and 72 h;

three biological replicates at each time point and two treatments, namely, saline and LPS) were selected in equal quantities. Briefly, after construction of strand-specific cDNA libraries, sequencing was performed on Illumina HiSeq 4000 platform by BGI Co., Ltd. (Shenzhen, China). The original raw data was saved in FASTQ/FQ file format. Bowtie2 was used for mapping of clean reads to reference gene and HISAT to reference chicken genome (release: *Gallus gallus* 5.0). The gene expression was quantified by FPKM (fragments per kilobase per million) method using RSEM (Random-Sampling Empirical Myerson) quantification tool [52]. NOISeq method was used to screen differentially expression genes (DEGs) between two groups (saline vs. LPS) at 12, 36 and 72 h by using absolute fold change  $\geq 2$  and divergent probability  $\geq 0.8$  [53].

For the purpose of functional classification of genes, Gene Ontology (GO) database that offers an up to date database for terminology and comprehensive illustration of the characteristics of genes and gene products in a given organism species was used [54]. DEGs were annotated on the basis of three ontologies, namely, biological process, molecular function and cellular component. Similarly, Kyoto Encyclopedia of Genes and Genomes (KEGG) database (<http://www.genome.jp/kegg>) was used to discover the link between differential genes and various KEGG pathways and to determine functional pathway analysis [55].

## Statistical analysis

GraphPad Prism version 5.0 was used for statistical analyses. The data is shown as mean  $\pm$  standard deviation (SD). Independent-samples *t* test was applied to calculate significant differences between groups in the same tissue regions. Bonferroni's multiple comparisons test after one-way ANOVA test was applied to calculate statistical significance among multiple sample sets *versus* control samples. Differences were considered significant if  $P < 0.05$  i.e., \* $P < 0.05$ , \*\* $P < 0.01$  and \*\*\* $P < 0.001$ .

## Availability of supporting data

All the relevant datasets supporting the findings of the current study have been provided in the article and its supporting information. The raw sequence reads (RNA-seq data) associated with this study have been submitted to the National Center for Biotechnology Information (NCBI) Short Read Archive (SRA) under accession code SRP093225.

## Abbreviations

LPS, lipopolysaccharide; BF, bursa of Fabricius; RNA-seq, RNA sequencing; STm, *Salmonella enterica* serovar Typhimurium; TLRs, toll like receptors; HRH, horseradish peroxidase; PCNA, proliferating cell nuclear antigen; ssDNA, single stranded DNA; IPP, Image-Pro-plus; h, hour/hours; PBS, phosphate buffered saline; H&E, Hematoxylin and Eosin; IHC, Immunohistochemistry; SD, standard deviation; SABC, strept avidin biotin complex; DAB, 3,3'-diaminobenzidine; BSA, bovine serum albumin; NF- $\kappa$ B, nuclear factor- $\kappa$ B; IL, interleukin; G1, growth 1 phase; S phase, DNA synthesis phase; RT-qPCR, quantitative real time polymerase chain reaction; IOD, integrated optical density; TUNEL, terminal-deoxynucleotidyl transferase mediated nick end labeling; POD, peroxide; JNK, c-Jun NH<sub>2</sub>-terminal kinase; MAPK, mitogen-activated protein kinase; BPI, Bactericidal/permeability-increasing protein; AVD, avidin; CNN1, calponin 1; SEM, scanning electron microscopy; HMDS, hexamethyldisilazane; TdT, terminal deoxynucleotidyl transferase; PVDF, polyvinylidene difluoride; SDS-PAGE, sodium dodecyl sulfate polyacrylamide gel electrophoresis; GO, Gene Ontology; KEGG, kyoto encyclopedia of genes and genomes.

## Authors' contributions

HZL, NAK and JMZ planned and conceived the experiments. ARA, HBH, NYL, ZJS, LC and YFH performed the experiments and carried out other laboratory works. HZL and ARA analyzed data, designed the figures and wrote the manuscript. HZL, NAK, JMZ and ARA performed the proof reading. All the authors read and approved the final manuscript.

## ACKNOWLEDGMENTS

None.

## CONFLICTS OF INTEREST

The authors declare that they have no competing interests.

## FUNDING

This work was supported by the Fundamental Research Funds for the Central Universities (2662016PY011, 2014PY046) and grants from the National Natural Science Foundation of China (30800808).

## REFERENCES

1. Liu XD, Zhang FB, Shan H, Chen PY. The potential mechanism of bursal-derived BP8 on B cell developments. *Biotechnol Lett.* 2015; 37: 1013-20.
2. Yin S, Cui H, Peng X, Fang J, Zuo Z, Deng J, Wang X, Wu B, Guo H. Toxic effect of NiCl<sub>2</sub> on development of the bursa of Fabricius in broiler chickens. *Oncotarget.* 2016; 7: 125-39. doi: 10.18632/oncotarget.6591.
3. Lee CC, Kim BS, Wu C, Lin T. Bursal transcriptome of chickens protected by DNA vaccination versus those challenged with infectious bursal disease virus. *Arch Virol.* 2015; 160: 69-80.
4. Sharma JM, Kim IJ, Rautenschlein S, Yeh HY. Infectious bursal disease virus of chickens: pathogenesis and immunosuppression. *Dev Comp Immunol.* 2000; 24: 223-35.
5. Heidari M, Fitzgerald SD, Zhang H. Marek's disease virus-induced transient cecal tonsil atrophy. *Avian Dis.* 2014; 58: 262-70.
6. Nair V. Evolution of Marek's disease –A paradigm for incessant race between the pathogen and the host. *Vet J.* 2005; 170: 175-83.
7. Steer PA, Sandy JR, O'Rourke D, Scott PC, Browning GF, Noormohammadi AH. Chronological analysis of gross and histological lesions induced by field strains of fowl adenovirus serotypes 1, 8b and 11 in one-day-old chickens. *Avian Pathol.* 2015; 44: 106-13.
8. Nazir S, Mir SK, Goudar MD. Pathology and colonization of internal organs after experimental infection of broiler chickens with *Salmonella Gallinarum* through oral or intraperitoneal routes. *Revue d'élevage et de médecine vétérinaire des pays tropicaux.* 2014; 67: 53-60.
9. Nakamura K, Imada Y, Maeda M. Lymphocytic depletion of bursa of Fabricius and thymus in chickens inoculated with *Escherichia coli*. *Vet Pathol.* 1986; 23: 712-17.
10. Sadeghi AA, Shawrang P, Shakorzadeh S. Immune Response of *Salmonella* Challenged Broiler Chickens Fed Diets Containing Gallipro®, a *Bacillus subtilis* Probiotic. *Probiotics Antimicrob Proteins.* 2015; 7: 24-30.
11. Withanage G, Kaiser P, Wigley P, Powers C, Mastroeni P, Brooks H, Barrow P, Smith A, Maskell D, McConnell I. Rapid expression of chemokines and proinflammatory cytokines in newly hatched chickens infected with *Salmonella enterica* serovar typhimurium. *Infect Immun.* 2004; 72: 2152-9.
12. Leveque G, Forgetta V, Morroll S, Smith AL, Bumstead N, Barrow P, Loredó-Osti J, Morgan K, Malo D. Allelic variation in TLR4 is linked to susceptibility to *Salmonella enterica* serovar Typhimurium infection in chickens. *Infect Immun.* 2003; 71: 1116-24.
13. St John AL, Abraham SN. *Salmonella* disrupts lymph node architecture by TLR4-mediated suppression of homeostatic chemokines. *Nature Med.* 2009; 15: 1259-65.

14. Huang H, Liu A, Wu H, Ansari AR, Wang J, Huang X, Zhao X, Peng K, Zhong J, Liu H. Transcriptome analysis indicated that Salmonella lipopolysaccharide-induced thymocyte death and thymic atrophy were related to TLR4-FOS/JUN pathway in chicks. *BMC Genomics*. 2016; 17: 322. doi: 10.1186/s12864-016-2674-6.
15. Ross EA, Coughlan RE, Flores-Langarica A, Lax S, Nicholson J, Desanti GE, Marshall JL, Bobat S, Hitchcock J, White A, Jenkinson WE. Thymic function is maintained during Salmonella-induced atrophy and recovery. *J Immunol*. 2012; 189: 4266-74.
16. Taylor R, McCorkle F. A landmark contribution to poultry science—Immunological function of the bursa of Fabricius. *Poult Sci*. 2009; 88: 816-23.
17. Bar-Shira E, Sklan D, Friedman A. Establishment of immune competence in the avian GALT during the immediate post-hatch period. *Dev Comp Immunol*. 2003; 27: 147-57.
18. Hernández LV, Gonzalo S, Castro M, Arruebo MP, Plaza MA, Murillo MD, Grasa L. Nuclear factor  $\kappa$ B is a key transcription factor in the duodenal contractility alterations induced by lipopolysaccharide. *Exp Physiol*. 2011; 96: 1151-62.
19. Heckert R, Estevez I, Russek-Cohen E, Pettit-Riley R. Effects of density and perch availability on the immune status of broilers. *Poult Sci*. 2002; 81: 451-4.
20. Akira S, Sato S. Toll-like receptors and their signaling mechanisms. *Scand J Infect Dis*. 2003; 35: 555–62.
21. Basu M, Paichha M, Swain B, Lenka SS, Singh S, Chakrabarti R, Samanta M. Modulation of TLR2, TLR4, TLR5, NOD1 and NOD2 receptor gene expressions and their downstream signaling molecules following thermal stress in the Indian major carp catla (*Catla catla*). *3 Biotech*. 2015; 5: 1021-30.
22. Lüttgenau J, Herzog K, Strüve K, Latter S, Boos A, Bruckmaier RM, Bollwein H, Kowalewski MP. LPS-mediated effects and spatio-temporal expression of TLR2 and TLR4 in the bovine corpus luteum. *Reproduction*. 2016; 151: 391-9.
23. Al-Mayah AA, Tabeekh MA. Investigation on bursa Fabricius and body weights in broilers and local chicks vaccinated with two types of infectious bursal disease vaccines. *Int J Poult Sci*. 2010; 9: 464-7.
24. Konjević D, Srebočan E, Gudan A, Lojkić I, Severin K, Sokolović M. A pathological condition possibly caused by spontaneous trichotecene poisoning in Brahma poultry: first report. *Avian Pathol*. 2004; 33: 377-80.
25. Xie H, Rath NC, Huff GR, Huff WE, Balog JM. Effects of Salmonella typhimurium lipopolysaccharide on broiler chickens. *Poult Sci*. 2000; 79: 33-40.
26. Kobayashi T, Walsh MC, Choi Y. The role of TRAF6 in signal transduction and the immune response. *Microb Infect*. 2004; 6: 1333-38.
27. Murshid A, Gong J, Prince T, Borges TJ, Calderwood SK. Scavenger Receptor SREC-I Mediated Entry of TLR4 into Lipid Microdomains and Triggered Inflammatory Cytokine Release in RAW 264.7 Cells upon LPS Activation. *PLoS ONE*. 2015; 10: e0122529.
28. Savill J, Dransfield I, Gregory C, Haslett C. A blast from the past: clearance of apoptotic cells regulates immune responses. *Nat Rev Immunol*. 2002; 2: 965-75.
29. Hotchkiss RS, Karl IE. The Pathophysiology and Treatment of Sepsis. *N Engl J Med*. 2003; 348: 138-50.
30. Wesche DE, Lomas-Neira JL, Perl M, Chung CS, Ayala A. Leukocyte apoptosis and its significance in sepsis and shock. *J Leukoc Biol*. 2005; 78: 325-37.
31. Morales-Lopez R, Brufau J. Immune-modulatory effects of dietary *Saccharomyces cerevisiae* cell wall in broiler chickens inoculated with *Escherichia coli* lipopolysaccharide. *British Poult Sci*. 2013; 54: 247-51.
32. Serhan CN, Brain SD, Buckley CD, Gilroy DW, Haslett C, O'Neill LA, Perretti M, Rossi AG, Wallace JL. Resolution of inflammation: state of the art, definitions and terms. *FASEB*. 2007; 21: 325-32.
33. Savill JS, Wyllie AH, Henson JE, Walport MJ, Henson PM, Haslett C. Macrophage phagocytosis of aging neutrophils in inflammation. Programmed cell death in the neutrophil leads to its recognition by macrophages. *J Clin Invest*. 1989; 83: 865-75.
34. Takeuchi O, Akira S. Pattern Recognition Receptors and Inflammation. *Cell*. 2010; 140: 805-20.
35. Murdock JL, Núñez G. TLR4: The Winding Road to the Discovery of the LPS Receptor. *J Immunol*. 2016; 197: 2561-2.
36. Kayagaki N, Wong MT, Stowe IB, Ramani SR, Gonzalez LC, Akashi-Takamura S, Miyake K, Zhang J, Lee WP, Muszyński A, Forsberg LS, Carlson RW, Dixit VM. Noncanonical Inflammasome Activation by Intracellular LPS Independent of TLR4. *Science*. 2013; 341: 1246-9.
37. Kagan JC. Sensing Endotoxins from Within. *Science*. 2013; 341: 1184-5.
38. Coburn B, Grassl GA, Finlay B. Salmonella, the host and disease: a brief review. *Immunol Cell Biol*. 2007; 85: 112-8.
39. Estruch M, Sanchez-Quesada JL, Ordoñez-Llanos J, Benitez S. Inflammatory intracellular pathways activated by electronegative LDL in monocytes. *BBA-Mol Cell Biol Lipids*. 2016; 1861: 963-9.
40. He W, Wang Z, Zhou Z, Zhang Y, Zhu Q, Wei K, Lin Y, Cooper PR, Smith AJ, Yu Q. Lipopolysaccharide Enhances Wnt5a Expression through Toll-like Receptor 4, Myeloid Differentiating Factor 88, Phosphatidylinositol 3-OH Kinase/AKT and Nuclear Factor Kappa B Pathways in Human Dental Pulp Stem Cells. *J Endodont*. 2014; 40: 69-75.
41. Bancroft CC, Chen Z, Dong G, Sunwoo JB, Yeh N, Park C, Van Waes C. Coexpression of Proangiogenic Factors IL-8 and VEGF by Human Head and Neck Squamous Cell Carcinoma Involves Coactivation by MEK-MAPK and



- IKK-NF- $\kappa$ B Signal Pathways. *Clin Cancer Res.* 2001; 7: 435-42.
42. Guha M, O'Connell MA, Pawlinski R, Hollis A, McGovern P, Yan SF, Stern D, Mackman N. Lipopolysaccharide activation of the MEK-ERK1/2 pathway in human monocytic cells mediates tissue factor and tumor necrosis factor  $\alpha$  expression by inducing Elk-1 phosphorylation and Egr-1 expression. *Blood.* 2001; 98: 1429-39.
  43. Intayoung P, Limtrakul P, Yodkeeree S. Antiinflammatory Activities of Crebanine by Inhibition of NF- $\kappa$ B and AP-1 Activation through Suppressing MAPKs and Akt Signaling in LPS-Induced RAW264.7 Macrophages. *Biol Pharm Bull.* 2016; 39: 54-61.
  44. Fan B, Dun SH, Gu JQ, Guo Y, Ikuyama S. Pycnogenol Attenuates the Release of Proinflammatory Cytokines and Expression of Perilipin 2 in Lipopolysaccharide-Stimulated Microglia in Part via Inhibition of NF- $\kappa$ B and AP-1 Activation. *PLoS ONE.* 2015; 10: e0137837.
  45. Gius D, Botero A, Shah S, Curry HA. Intracellular oxidation/reduction status in the regulation of transcription factors NF- $\kappa$ B and AP-1. *Toxicol Lett.* 1999; 106: 93-106.
  46. Whitmarsh AJ, Davis RJ. Transcription factor AP-1 regulation by mitogen-activated protein kinase signal transduction pathways. *J Mol Med.* 1996; 74: 589-607.
  47. Chinetti G, Griglio S, Antonucci M, Torra IP, Delerive P, Majd Z, Fruchart JC, Chapman J, Najib J, Staels B. Activation of Proliferator-activated Receptors  $\alpha$  and  $\gamma$  Induces Apoptosis of Human Monocyte-derived Macrophages. *J Biol Chem.* 1998; 273: 25573-80.
  48. Buravkov SV, Chernikov VP, Buravkova LB. Simple Method of Specimen Preparation for Scanning Electron Microscopy. *Bull Exp Biol Med.* 2011; 151: 378-82.
  49. Ansari AR, Wen L, Huang HB, Wang JX, Huang XY, Peng KM, Liu HZ. Lipopolysaccharide stimulation upregulated Toll-like receptor 4 expression in chicken cerebellum. *Vet Immunol Immunopathol.* 2015; 166: 145-50.
  50. Kyrylkova K, Kyryachenko S, Leid M, Kioussi C. Detection of Apoptosis by TUNEL Assay. In: Kioussi C, ed. *Odontogenesis: Methods and Protocols.* Totowa, NJ: Humana Press. 2012; pp. 41-7.
  51. Hnasko TS, Hnasko RM. The Western Blot. In: Hnasko R, ed. *ELISA: Methods and Protocols.* New York, NY: Springer New York. 2015; pp. 87-96.
  52. Li B, Dewey CN. RSEM: accurate transcript quantification from RNA-Seq data with or without a reference genome. *BMC Bioinformatics.* 2011; 12: 323. doi: 10.1186/1471-2105-12-323.
  53. Tarazona S, García-Alcalde F, Dopazo J, Ferrer A, Conesa A. Differential expression in RNA-seq: A matter of depth. *Genome Res.* 2011; 21: 2213-23.
  54. Consortium GO. The Gene Ontology (GO) database and informatics resource. *Nucleic Acids Res.* 2004; 32: D258-61.
  55. Aoki-Kinoshita KF, Kanehisa M. Gene Annotation and Pathway Mapping in KEGG. In: Bergman NH, ed. *Comparative Genomics.* Totowa, NJ: Humana Press. 2007; pp. 71-91.
