# Supplementary material for: Lipopolysaccharide induces acute bursal atrophy in broiler chicks by activating TLR4-MAPK-NF-κB/AP-1 signaling
Source: PubMed Central journal article supplement (PMC5752450; doi:10.18632/oncotarget.19964), 2017-08-05
Supplement: oncotarget-08-108375-s001.pdf [file oncotarget-08-108375-s001.pdf]

## **Lipopolysaccharide induces acute bursal atrophy in broiler chicks by activating TLR4-MAPK-NF- $\kappa$ B/AP-1 signaling**

### **SUPPLEMENTARY MATERIALS**

**For Supplementary Tables see in Supplementary Files**
